# Supplementary material
Source: MDPI journal article supplement (https://www.mdpi.com/2071-1050/13/9/4625)
Supplement: s1 [file s1]

## SUPPLEMENTARY MATERIALS

### Research Trends in Career Success: A Bibliometric Review

#### Supplementary Materials:

**Table S 1:** Results of the co-occurrence network of author keywords.

| Cluster                                           | Occurrences | Links | Total link strength | Author Keywords        |
|---------------------------------------------------|-------------|-------|---------------------|------------------------|
| 1<br>(20 nodes)<br>Rojo<br>'Career and<br>Gender' | 108         | 53    | 165                 | Careers                |
|                                                   | 76          | 51    | 125                 | Gender                 |
|                                                   | 74          | 41    | 111                 | Mentoring              |
|                                                   | 41          | 30    | 74                  | Women                  |
|                                                   | 21          | 22    | 37                  | Leadership             |
|                                                   | 20          | 22    | 37                  | Success                |
|                                                   | 13          | 15    | 25                  | Management             |
|                                                   | 9           | 12    | 17                  | Promotion              |
|                                                   | 8           | 6     | 6                   | Diversity              |
|                                                   | 7           | 10    | 13                  | Development            |
|                                                   | 7           | 7     | 8                   | Management Development |
|                                                   | 7           | 11    | 13                  | Well-Being             |
|                                                   | 6           | 9     | 12                  | Happiness              |
|                                                   | 6           | 11    | 13                  | Resilience             |
|                                                   | 6           | 5     | 5                   | Students               |
|                                                   | 6           | 6     | 11                  | Work                   |
|                                                   | 5           | 6     | 7                   | Disability             |

|                  |     |    |     |                                         |
|------------------|-----|----|-----|-----------------------------------------|
|                  | 5   | 6  | 7   | Health                                  |
|                  | 5   | 7  | 9   | Learning                                |
|                  | 5   | 6  | 6   | Mobility                                |
|                  | 59  | 42 | 69  | Objective And Subjective Career Success |
|                  | 55  | 42 | 106 | Career Satisfaction                     |
|                  | 22  | 22 | 49  | Salary                                  |
| 2                | 20  | 14 | 26  | Career Adaptability                     |
| (11 nodes)       | 12  | 12 | 19  | Life Satisfaction                       |
| Verde            | 11  | 6  | 13  | Career Commitment                       |
| 'Objective and   | 7   | 9  | 11  | Work Engagement                         |
| Subjective       | 5   | 7  | 9   | Calling                                 |
| 'Career Success' | 5   | 8  | 10  | Job Insecurity                          |
|                  | 5   | 8  | 9   | Occupational Self-Efficacy              |
|                  | 5   | 8  | 11  | Status                                  |
|                  | 276 | 71 | 319 | <b>Career Success</b>                   |
|                  | 31  | 26 | 59  | Personality                             |
|                  | 23  | 18 | 29  | Skills                                  |
| 3                | 10  | 11 | 18  | Proactive Personality                   |
| (11 nodes)       | 9   | 14 | 16  | Motivation                              |
| Azul             | 8   | 10 | 12  | Social Networks                         |
| 'Career          | 7   | 6  | 7   | Curriculum                              |
| 'Success'        | 6   | 16 | 17  | Meta-Analysis                           |
|                  | 6   | 5  | 6   | Perceived Employability                 |
|                  | 5   | 12 | 15  | Big Five                                |
|                  | 5   | 5  | 8   | Core Self-Evaluations                   |
|                  | 27  | 21 | 36  | Emotional Intelligence                  |

|                                                            |    |    |    |                                   |
|------------------------------------------------------------|----|----|----|-----------------------------------|
| 4<br>(11 nodes)<br>Amarillo<br>'Emotional<br>Intelligence' | 16 | 14 | 20 | Professional Development          |
|                                                            | 15 | 12 | 19 | Self-Efficacy                     |
|                                                            | 9  | 12 | 14 | Career Outcomes                   |
|                                                            | 8  | 8  | 12 | Human Resource Management         |
|                                                            | 7  | 10 | 11 | Assessment                        |
|                                                            | 7  | 11 | 16 | Career Capital                    |
|                                                            | 7  | 8  | 9  | Culture                           |
|                                                            | 6  | 8  | 9  | Attitudes                         |
|                                                            | 6  | 3  | 3  | Creativity                        |
| 5<br>(11 nodes)<br>Violeta<br>'Job<br>Satisfaction'        | 5  | 13 | 14 | Master In Business Administration |
|                                                            | 43 | 29 | 71 | Job Satisfaction                  |
|                                                            | 11 | 18 | 27 | Job Performance                   |
|                                                            | 10 | 14 | 20 | Performance                       |
|                                                            | 8  | 8  | 9  | Agency                            |
|                                                            | 7  | 11 | 13 | Education                         |
|                                                            | 6  | 6  | 6  | Professional Success              |
|                                                            | 5  | 10 | 13 | Career Identity                   |
|                                                            | 5  | 7  | 9  | Career Motivation                 |
|                                                            | 5  | 4  | 6  | Older Workers                     |
|                                                            | 5  | 7  | 11 | Psychological Capital             |
| 6<br>(10 nodes)                                            | 5  | 9  | 9  | Work-Life Balance                 |
|                                                            | 20 | 23 | 31 | Higher Education                  |
|                                                            | 12 | 18 | 29 | Graduates                         |
|                                                            | 11 | 13 | 17 | Qualitative Research              |
|                                                            | 8  | 11 | 15 | Academic Careers                  |
|                                                            | 7  | 15 | 22 | Family                            |

|                                                   |    |    |     |                                |
|---------------------------------------------------|----|----|-----|--------------------------------|
| Celeste<br>'Higher<br>Education'                  | 7  | 12 | 15  | Young Adults                   |
|                                                   | 6  | 1  | 1   | Ethics                         |
|                                                   | 6  | 8  | 10  | Human Resource Development     |
|                                                   | 5  | 9  | 12  | Career Theory                  |
|                                                   | 5  | 10 | 10  | Soft Skills                    |
| 7<br>(10 nodes)<br>Naranja<br>'Employability'     | 25 | 20 | 37  | Employability                  |
|                                                   | 16 | 22 | 37  | Boundaryless Careers           |
|                                                   | 13 | 20 | 36  | Protean Career                 |
|                                                   | 12 | 9  | 14  | Career Management              |
|                                                   | 9  | 11 | 16  | Career Mobility                |
|                                                   | 9  | 11 | 17  | Career Self-Management         |
|                                                   | 7  | 7  | 7   | Entrepreneurship               |
|                                                   | 7  | 9  | 12  | Gender Differences             |
|                                                   | 6  | 9  | 10  | Social Cognitive Career Theory |
|                                                   | 5  | 6  | 9   | Scale Development              |
| 8<br>(8 nodes)<br>Café<br>'Career<br>Development' | 97 | 53 | 157 | Career Development             |
|                                                   | 24 | 25 | 46  | Social Capital                 |
|                                                   | 23 | 16 | 34  | Networking                     |
|                                                   | 19 | 16 | 34  | Human Capital                  |
|                                                   | 11 | 13 | 17  | Employment                     |
|                                                   | 9  | 11 | 14  | Organizational Commitment      |
|                                                   | 6  | 11 | 14  | Discrimination                 |
|                                                   | 5  | 10 | 11  | Organizational Politics        |
